# Supplementary material for: Non-Obstructive Azoospermia Prediction via Deep Learning-Driven Testicular Ultrasound Image Analysis: A Clinical Validation Study
Source: Research Square preprint supplement (doi:10.21203/rs.3.rs-8701642/v1), 2026-02-09
Supplement: Supplementary file 1 [file 19d2c36bcf90e739c8636e1e.docx]

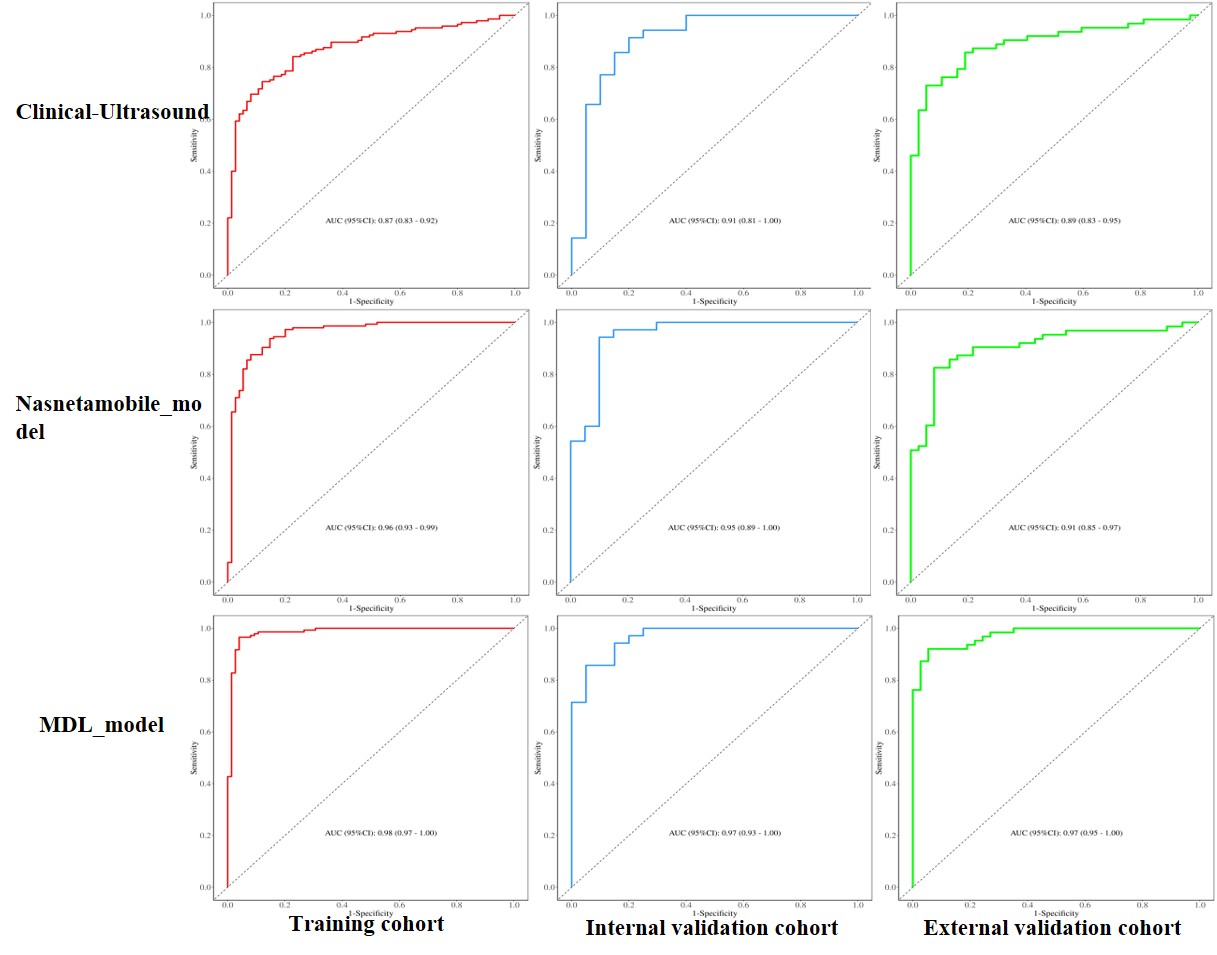


**Supplementary figure S1** Comparison of ROC curves for the three diagnostic models across the training, internal validation, and external test cohorts


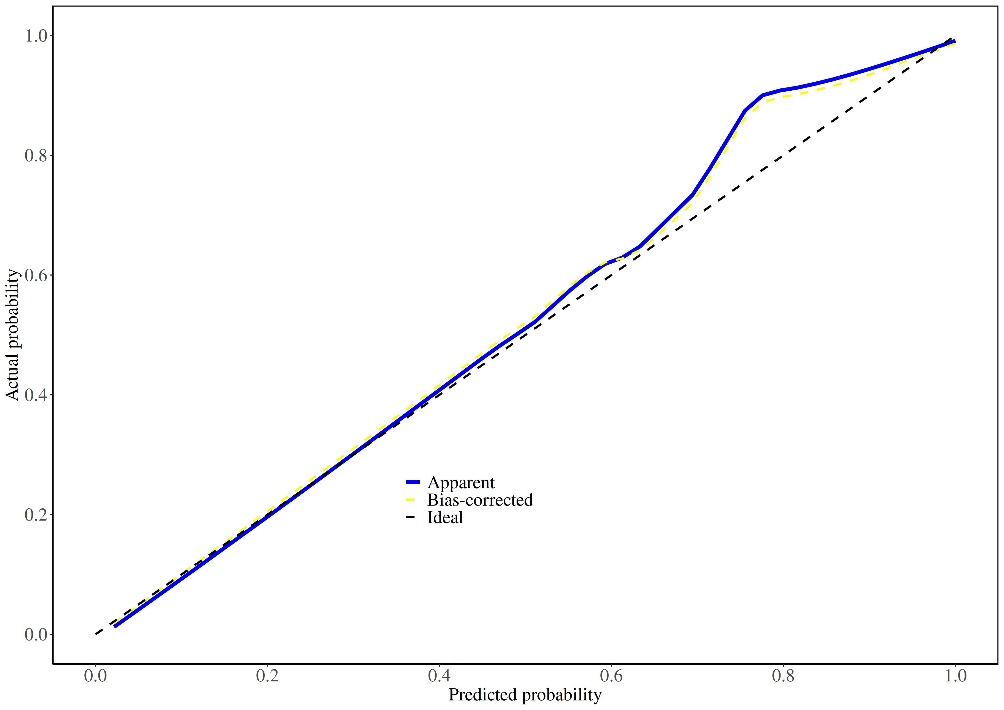


**Supplementary figure S2** Calibration curve of the integrated nomogram for predicting NOA in the validation cohort.


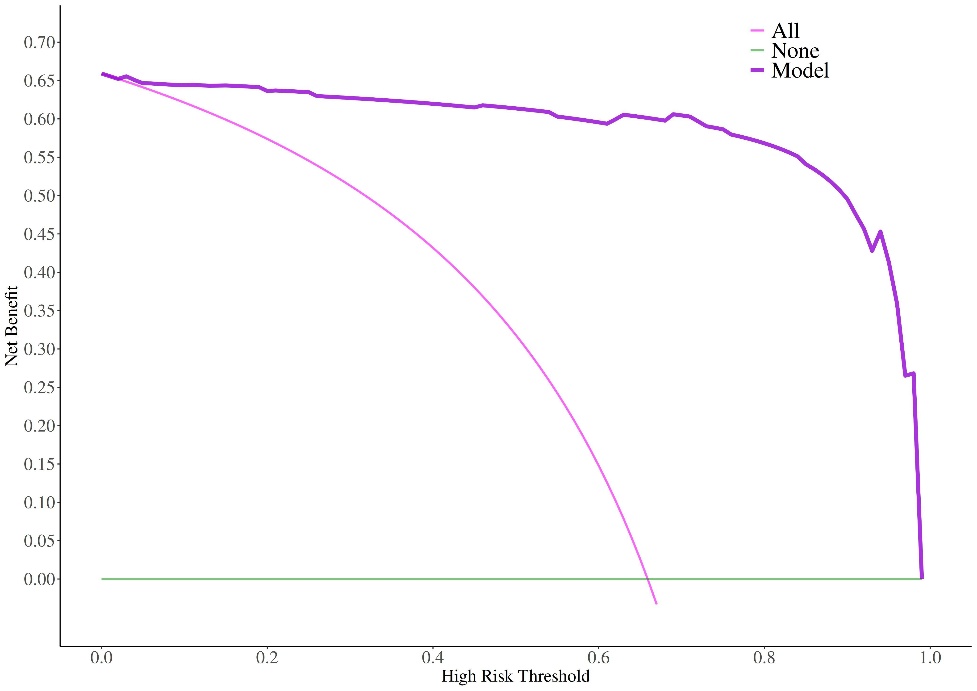


**Supplementary figure S3** Decision curve analysis evaluating the clinical utility of the three diagnostic models for NOA**.**

**Supplementary Table S1**: Laboratory Findings in Normal Controls, Obstructive Azoospermia, and Non-Obstructive Azoospermia Groups

| Variables | Total (n = 488) | OA (n = 131) | NOA (n = 244) | Normal  (n=113) | Statistic | *P* |
| --- | --- | --- | --- | --- | --- | --- |
| BMI | 25.29 ± 3.72 | 24.92 ± 3.59 | 25.55 ± 3.75 | 25.13± 3.78 | -0.50a | 0.618 |
| Age | 31.00 ± 3.92 | 31.05 ± 3.82 | 31.17 ± 3.83 | 30.58 ± 4.22 | -1.31a | 0.189 |
| Smoking duration | 7.00  (0.00, 10.00) | 7.50  (0.00, 10.00) | 6.00  (0.00, 10.00) | 7.00  (0.00,10.00) | -0.40b | 0.686 |
| Quantity of cigarettes  smoked | 0.50  (0.00, 1.00) | 0.50  (0.00, 1.00) | 0.50  (0.00, 2.00) | 0.50  (0.00, 1.00) | -0.60b | 0.550 |
| Night Shift, n (%) |  |  |  |  | 0.01b | 0.912 |
| No | 119 (24.39) | 36 (27.48) | 55 (22.54) | 28 (24.78) |  |  |
| Yes | 369 (75.61) | 95 (72.52) | 189 (77.46) | 85 (75.22) |  |  |
| High temperature, n (%) |  |  |  |  | 3.04b | 0.081 |
| No | 447 (91.60) | 122 (93.13) | 226 (92.62) | 99 (87.61) |  |  |
| Yes | 41 (8.40) | 9 (6.87) | 18 (7.38) | 14 (12.39) |  |  |
| Radiation, n (%) |  |  |  |  | 0.00b | 1.000 |
| No | 484 (99.18) | 130 (99.24) | 242 (99.18) | 112 (99.12) |  |  |
| Yes | 4 (0.82) | 1 (0.76) | 2 (0.82) | 1 (0.88) |  |  |
| Sedentary behavior, n (%) |  |  |  |  | 1.47b | 0.225 |
| No | 265 (54.30) | 69 (52.67) | 129 (52.87) | 67 (59.29) |  |  |
| Yes | 223 (45.70) | 62 (47.33) | 115 (47.13) | 46 (40.71) |  |  |
| Diabetes, n (%) |  |  |  |  | - | 1.000 |
| No | 487 (99.80) | 131 (100.00) | 243 (99.59) | 113 (100.00) |  |  |
| Yes | 1 (0.20) | 0 (0.00) | 1 (0.41) | 0 (0.00) |  |  |
| Hypertension, n (%) |  |  |  |  | 0.00b | 1.000 |
| No | 474 (97.13) | 126 (96.18) | 238 (97.54) | 110 (97.35) |  |  |
| Yes | 14 (2.87) | 5 (3.82) | 6 (2.46) | 3 (2.65) |  |  |
| Alcohol consumption, n (%) |  |  |  |  | 89.63b | <0.001* |
| No | 259 (53.07) | 47 (35.88) | 108 (44.26) | 104 (92.04) |  |  |
| Yes | 229 (46.93) | 84 (64.12) | 136 (55.74) | 9 (7.96) |  |  |

Note: n:number of patients; BMI: Body Mass Index; a: ANOVA, b: Kruskal-waills test

Supplementary table S2: Ultrasonographic and Hormonal Parameters in Azoospermia versus Healthy Controls

| Variables | Total (n =388) | Azoospermia  (n =275) | Normal(n=113) | Statistic | *P* |
| --- | --- | --- | --- | --- | --- |
| Testicular volume,  M (Q₁, Q₃) | 12.57  (8.50, 15.76) | 11.70  (7.00, 15.27) | 13.60  (11.43, 16.66) | -4.29a | **<0.001*** |
| RI, Mean ± SD | 0.63 ± 0.10 | 0.64 ± 0.11 | 0.60 ± 0.06 | -4.37b | **<0.001*** |
| PSV, Mean ± SD | 7.42 ± 2.20 | 7.25 ± 2.28 | 7.83 ± 1.94 | 2.37b | **<0.018** |
| EDV, Mean ± SD | 2.83 ± 0.98 | 3.07 ± 0.83 | 2.72 ± 1.01 | 3.51b | **<0.001*** |
| Mean, Mean ± SD | 4.41 ± 1.52 | 4.77 ± 1.22 | 4.27 ± 1.60 | 3.39b | **<0.001*** |
| SWE, M (Q₁, Q₃) | 1.65  (1.44, 1.94) | 1.59  (1.37, 1.94) | 1.75  (1.55, 1.94) | -3.14a | **0.002*** |
| FSH, M (Q₁, Q₃) | 7.31  (4.42, 18.48) | 11.10  (4.88, 23.71) | 5.11  (3.79, 7.46) | -7.13a | **<0.001*** |
| LH, M (Q₁, Q₃) | 6.12  (4.20, 9.79) | 6.73  (4.20, 11.02) | 5.60  (4.30, 6.81) | -3.35a | **<0.001*** |
| T, M (Q₁, Q₃) | 4.50  (3.16, 7.90) | 4.12  (2.79, 6.92) | 5.02  (4.02, 8.90) | -3.62a | **<0.001*** |
| E2, M (Q₁, Q₃) | 31.00  (23.22, 41.79) | 30.80  (23.30, 42.25) | 31.40  (23.10, 41.70) | -0.33a | 0.743 |
| PRL, M (Q₁, Q₃) | 13.38  (9.73, 22.20) | 13.80  (9.79, 26.00) | 12.20  (9.13, 16.86) | -2.64a | **0.008*** |

Note: n: number of testicular Statistic: a: Mann-Whitney test; b: t-test,

SD: standard deviation, M: Median, Q₁: 1st Quartile, Q₃: 3st Quartile
